**A shielded irradiation assay to investigate mechanisms of *in vivo* stem cell migration in planarians.**

Prasad Abnave<sup>1</sup>, Ellen Aboukhatwa<sup>1</sup>, Nobuyoshi Kosaka<sup>1</sup>, James Thompson<sup>2</sup>, Mark A. Hill<sup>2</sup>, A. Aziz Aboobaker<sup>1\*</sup>

1. Department of Zoology, Tinbergen Building, South Parks Road, University of Oxford, Oxford OX1 3PS, United Kingdom

2. CRUK/MRC Oxford Institute for Radiation Oncology, ORCRB Roosevelt Drive, University of Oxford, Oxford OX3 7DQ, United Kingdom

correspondence: [Aziz.Aboobaker@zoo.ox.ac.uk](mailto:Aziz.Aboobaker@zoo.ox.ac.uk)

## Abstract

The migration of stem cells is an essential process underpinning the physiology of all metazoan animals. In order for tissues to be maintained, homeostatic signaling mechanisms must allow stem cells or their progeny to arrive at the correct position and differentiate into replacement cells. This need is even more acute after tissue damage by wounding or pathogenic infections. Inappropriate migration of tumorigenic cancer stem cells and their progeny in adults also underpins the formation of metastases. Despite this, few mechanistic studies address stem cell migration during repair after injury in adult tissues. Here we present a shielded X-ray irradiation assay that allows us to watch cell migration in the highly regenerative planarian model system. We demonstrate that we can carefully observe migratory behavior and reveal new phenomena concerning migration, not previously observed in planarians. These include observation of cell migration specifically in an anterior direction in the absence of injury. We demonstrate that this homeostatic migration requires the polarity determinant *notum*. The morphology and distribution of migrating stem cells implicates mechanisms associated with epithelial to mesenchymal transition (EMT). In agreement with this we find that a planarian Snail family transcription factor is necessary for stem cell and stem cell progeny migration to wound sites and for the establishment of migratory morphology. Overall our data establish planarians as a suitable model for further in depth study of cell migration, with the potential to yield novel insights relevant to human biology including hyperplasia during cancer progression.

## Introduction

Regeneration and tissue homeostasis in multicellular animals are a result of the activity of their stem cells. Most animal adult life histories include some potential to regenerate lost cells, tissues and organs but the efficiency and extent of the regenerative process varies greatly amongst species. Many basal invertebrates like cnidarians, flatworms and annelids are capable of whole body regeneration and some of these are now experimentally tractable model organisms for studying regeneration and homeostasis<sup>1-2</sup>. Studies of invertebrate stem cells that contribute to regeneration and homeostasis inform us about the origins of key stem cell properties, such as the abilities to self-renew, produce progeny that interpret positional information to differentiate and form the cells necessary for tissue and organ homeostasis and regeneration<sup>1-2</sup>. In planarians, for example, adult stem cells collectively called neoblasts fuel regeneration and are now known include both pluripotent stem cells and distinct classes of lineage committed cycling cells<sup>3-4</sup>.

So far few studies in regenerative models have investigated stem cell and stem cell progeny migration, even though migration to site of injury or homeostatic migration is a key stem cell activity for regeneration and repair and has important biomedical applications<sup>5-7</sup>. The over-activity of migratory mechanisms is a feature of tumor tissue invasion and the pathology caused by cancers<sup>8</sup>. More recently it has become clear that stem cell migration is tied to other key features of stem cell biology such as potency, differentiation and genome stability<sup>9</sup>. Thus defects in this key part of stem cell function are likely to contribute to many age related processes leading to disease, and these links remain poorly described, particularly *in vivo*<sup>10</sup>. Many studies have revealed common mechanisms driving cell migration in different contexts<sup>10-13</sup>. However, studying cell migration *in vivo* is technically challenging, and simple model systems amenable to functional study may have a lot to offer. For example, *in vivo* studies in both *Drosophila* and *C. elegans* during embryogenesis and larval development have proved very useful for unveiling fundamental molecular mechanisms also used by vertebrates<sup>14,5,15-17</sup>. The planarian system, in which stem cell and their progeny can be easily identified and studied, is another potentially tractable system<sup>18</sup>. Here we used the model planarian *Schmidtea mediterranea* to study cell migration during regeneration and normal tissue homeostasis. So far most studies in *Schmidtea* have focused on how stem cell self-renewal, division and differentiation are controlled or how more broadly tissue polarity and position are controlled<sup>19-22,4,23</sup>. Less focus has been given to cell migration, although it is an

essential component of a successful regenerative outcome. In this work we perfect an assay to allow precise observation of cell migration and describe novel phenomena regarding cell migration in the planarian system, including cell migration in the absence of wounding. Our work uncovers an intricate relationship between known stem cell and stem cell progeny lineages and the order of cell migration, suggesting a close relationship between the migration, proliferation and differentiation processes. We also show that RNAi can be efficiently employed with our migration assay. This allowed us to demonstrated clearly the requirements for Snail family transcription factor and a matrix-metalloprotease (MMP) for normal cell migration. Finally, we show that the anterior migration of stem cell and stem cell progeny in the absence of wounding relies on the previously described polarity protein *Notum*. Our work establishes the possibility of using *Schmidtea* as a highly effective model system to study adult stem cell migration in a regenerative context.

## Results

### Establishment of an X-ray shielded method for tracking stem cell migration

Classic research using planarians nearly a century ago established that planarian regenerative properties were sensitive to high doses of ionizing radiation and later this was attributed to the fact that proliferative stem cells, called neoblasts, were killed by the irradiation<sup>25</sup>. Partially exposing planarians to ionizing radiation, through use of a lead shield, was shown to slow down regenerative ability and suggested the possibility that neoblasts were potentially able to move to exposed regions and restore regenerative ability<sup>26</sup>. Recently established methods for tracking cell migration in planarians have either revisited shielding some portion of the stem cell population from irradiation or involved transplanting tissue with stem cells into lethally irradiated hosts<sup>7,27</sup>. These methods clearly showed movement of proliferative stem cells and stem cell progeny<sup>7,27</sup>. However, these approaches have some technical features that may have made the study of gene function challenging. Firstly, both approaches as published required the use of large animals. Larger planarians require some special attention for culturing and can be more difficult to work with. For example, in situ hybridization approaches are less effective in larger animals<sup>28</sup>. Secondly, shielding as well as transplanting individual worms becomes labor intensive if performed on larger numbers of worms required for functional genomic approaches, which needs consistent treatment. With this in mind we set out with the goal of adapting the classical lead shielding approach and establishing an assay to tackle these existing technical issues, making it more practical to exploit *Schmidtea* to study the molecular

control of cell migration. Specifically, we wished to be able to use irradiation to generate a much smaller shielded region to allow the use of smaller worms and at the same time be able to perform consistent experiments across a larger number of animals, rather than shielding animals individually.

We designed an irradiation technique in which multiple animals can be uniformly irradiated with X-rays, apart from a thin strip in a predetermined position along its length. This is achieved by placing the animals directly above a 0.8 mm strip of lead (6.1 mm thick), to significantly attenuate the X-rays in the region just above lead (Supplementary Figure 1A and 1B, Figure 1A-C) to less than 5% (in the central 0.5mm region) of the dose in the rest of the animal (Supplementary Figure 1C).

Our final working version of the apparatus is conveniently designed to fit a standard 60 mm petri dish, with the lead shield lying below the diameter. Anaesthetized planarians are aligned across the diameter in preparation for X-ray exposure (Figure 1 A-C). We could then expose up to 20 ~3-5mm long worms simultaneously to a normally lethal 30 Gy X-ray dose in a 1 min 18 sec exposure, with the shielded region receiving <1.5 Gy. This allows for some precision in controlling the position of a surviving band of stem cells (Figure 1D and E). Looking at animals with the shield positioned centrally along the anterior to posterior (AP) axis we performed whole mount fluorescent in situ hybridization (WFISH) to assay the effectiveness of the shield. With the *smewi-1* stem cell marker we confirmed that all stem cells (*smewi-1*<sup>+</sup>) outside the shielded region disappear by 24 hours post irradiation (pi) and with the early epidermal lineage marker NB21.11e, that stem cell progeny (*prog1*<sup>+</sup>) outside the shielded region have differentiated by 4 days pi (Figure 1E and F). We observed that cells within the shield have a density equivalent to that in wild type animals not subjected to shielded irradiation, suggesting that the shield is effective at protecting cells (Figure 1E and F and see later for quantification). We also noted that there is no cell migration from the shielded region during this time (Figure 1E and F). We observed that a few *smewi-1*<sup>+</sup> cells very close to the shield boundary survived beyond 24 hours, but that these were not detected by 4 days (Figure 1F). We hypothesize that these cells receive an attenuated dose of ionizing radiation that is not lethal within 24 hours but nonetheless they are not competent to self-renew, instead they die or differentiate at later time points. These data established that any observation of migrating stem cells and stem cell progeny should ideally occur after 4 days pi, and that with an AP shield centrally positioned cells do not migrate in the absence of injury.

In summary our X-ray shielded assay system allows for convenient and precise observation of stem cell and stem cell progeny behavior over time post-irradiation, and in animals suitable for functional studies.

### **Anterior migration of stem cells and stem cell progeny in the absence of wounding**

We next decided to use our system to describe the movement of stem cells and stem cell progeny in worms after X-ray shielded irradiation to confirm and add to previous observations. The cycling stem cells in *Schmidtea* are normally present throughout the body but absent from in front of the photoreceptors and the centrally positioned pharynx and are not detectable within early regenerative blastema (Supplementary Figure 2A and B). These facts mean that in normal animals i) stem cells would not normally have far to migrate during normal homeostasis or regeneration as they will always be relatively close to where they are required, except for the anterior region and the pharynx, ii) in the context of early regeneration stem cell progeny migrate to establish the blastema tissue before stem cells, and iii) at least for the pharynx and the most anterior tissue, homeostasis is achieved by migration of post-mitotic stem cell progeny, not stem cells. Together this leads us to expect stem cell progeny to have migratory properties that are distinct from cycling stem cells, in particular that should be active during normal homeostasis and may respond earlier to wound signals. We hypothesized therefore that observations within the context of our X-ray shielded assay would be consistent with these cell behaviors.

To begin, we shielded animals of equal size at different positions along the AP axis and irradiated them (Figure 2A). When the shield was placed in the posterior region of worms we observed tissue death and regression from the anterior towards the shield (Figure 2B). Subsequently, we observed blastema formation and normal regeneration that took up to 50 days pi (Figure 2C). Using WFISH we were able to observe that stem cells and stem cell progeny did not migrate until anterior tissue had regressed to close to the wound site (Figure 2D). When animals were shielded in mid body regions with top of the shield level with the most anterior region of the pharynx we often observed regression from the anterior and posterior (Figure 2E). Again we subsequently observed blastema formation and regeneration that took up to 45 days (Figure 2F). In contrast, for animals where the posterior of the shield was positioned level with the posterior of the pharynx we observed that worms often displayed posterior regression and not anterior regression (Figure 2H and I). In these animals the head never regressed with the tail regressing and then regenerating normally over several

weeks (Figure 2I). These results suggest that leaving a stripe of more anteriorly positioned cells was somehow sufficient to maintain anterior tissues.

To investigate this further we irradiated animals with shields positioned at different points and performed WFISH to observe stem cells and stem cell progeny at different time points post irradiation. We observed that depending on the distance of the fixed posterior boundary of the shield from the anterior tip of animals we were able to observe migration of cells towards the anterior in the absence of wounding (Figure 2J and K). In shields placed more posteriorly we did not observe cell migration until homeostasis of anterior tissues had failed and/or tissue had regressed towards the shield (Figure 2D and G).

These data add to previous work that described that migration only occurs after wounding or when tissue homeostasis fails and tissue regression towards the wound occurs<sup>7</sup>. We find that when stem cells and stem cell progeny are in the pre-pharyngeal anterior region they can migrate to the anterior in the absence of wounding and before tissue homeostasis fails. This migratory activity restores the normal distribution of both progeny and stem cells and suggests the presence of anterior signals that can call stem cell and stem cell progeny into the brain and anterior structures over a restricted range. To quantify this effect we measured the anterior migration of stem cells and *progl*<sup>+</sup> cells from different starting distances (dependent on shield position) from the anterior tip of animals that were ~3 mm in length. We found that at starting distances up to ~1.2 mm from the anterior tip stem cell progeny and stem cells migrated robustly, but above this almost no migration was observed (Figure 2K). These observations suggest that an anterior signal exists for encouraging cell migration in intact animals that's acts over the brain region (Figure 2L). In normal animals this may be responsible for ensuring homeostasis of the brain and anterior regions, which are devoid of conspicuous numbers of cycling stem cells. Recently, a *Notum/Wnt11-6* dependent signaling mechanism for regulating brain size has been described as responsible for the recruitment of stem cells and stem cell progeny<sup>29</sup>. This regulatory circuit represents a candidate system for regulating the anterior migration that we observe in the absence of wounding. When cells in the shield are outside the range of this signal they do not migrate until tissue homeostasis fails and presumably signals emanating from regressing tissues are within range to trigger migration (Figure 2D).

## General features of planarian cell migration after wounding



We shielded animals over the pharynx and made anterior wounds. We used the lack of posterior migration in this experimental design to facilitate measurements of cell migration distances over time (Figure 3A). Quantifying *smcdwi-1*<sup>+</sup> stem cells, *prog1*<sup>+</sup> stem cell progeny and mitotic cells in the migratory region just anterior to the pharynx allowed us to develop a detailed overview of the migration process (Figure 3B-E).

While we observed that the most advanced *smcdwi-1*<sup>+</sup> cells can match the extent of migration of the most advanced *prog1*<sup>+</sup> cells, we also noticed that many more *prog1*<sup>+</sup> cells enter the migratory region than *smcdwi-1*<sup>+</sup> cells over the first 4 days post amputation (pa). (Figure 3B-D). This observations suggest that stem cell progeny react *en masse* to a wound derived signal and stem cells follow, either independently in response to the wound signal or because they somehow sense the migration of *prog1*<sup>+</sup> cells and follow, or some combination of both. By 7 days pa normal homeostatic ratios of stem cells and stem cell progeny present in the shielded region and unexposed animals are also restored in the migratory region just anterior to the shield (Figure 3D). We observed cells in M-phase within the field of migrating cells, the numbers of which increased in proportion with the numbers of migrating *smcdwi-1*<sup>+</sup> stem cells over time (Supplementary Figure 3A, B and Figure 3E). This pattern of stem cell proliferation in the migratory region is consistent with the homeostatic ratio of stem cells and stem cell progeny being restored by symmetric stem cell divisions as well as by further migration from the shield (Figure 3D). From this data we deduce that increases in number of both stem cell and stem cell progeny outside of the shielded region are fuelled initially by migration but then by both further migration and proliferation of stem cells.

Stem cell progeny that reach the wound site at 10 days pa can only have arisen from asymmetric divisions of stem cells as recently as 6 days pa as this is the maximum time before that differentiate and stop expressing the *prog-1* marker. Given the maximum migration speeds observed over the first 4 days pa (Figure 3C) these cells must be the progeny of stem cells that have already migrated. Taken together, this data suggests that migrating *smcdwi-1*<sup>+</sup> cells undergo both symmetric and asymmetric cell divisions that increase both the number of *smcdwi-1*<sup>+</sup> cells and *prog1*<sup>+</sup> cells, importantly providing a source of stem cell progeny that do not derive from the shielded region. We note the remarkable similarity in the dynamics that we observe here to normal regeneration after amputation, where stem cell progeny form the initial regeneration blastema with stem cells only following later.



We also wished to know how precise the homing of migrating cells to wounds could be. To investigate this we performed single ‘poke’ wounds at the midline or notches confined to one side of the animal (Supplementary Figure 3C and D). We observed that even these small injuries that were in relatively close proximity incited distinct migratory responses around each wound site, indicating that migrating cells home with precision to injuries (Supplementary Figure 3C and D). We note that despite the absence of stem cells and progeny in the anterior tissue field migrating stem cell progeny only migrated and collected around the wound, suggesting they may sense the rest of the ‘blank canvas’ at early time points and the wound signal takes precedence. We also observed as a general feature of migration towards the wound site that dorsal *progl*<sup>+</sup> cells appear to migrate more rapidly than ventral cells to the same wound (Supplementary Figure 3E, F), and that dorsal *smedwi-1*<sup>+</sup> cells migrate centrally while ventral stem cells migrate across the width of animals (Supplementary Figure 3G).

### **Migrating planarian cells have a distinct morphology of extended cell processes**

We next decided to investigate the migrating cells themselves in more detail, to see if we could understand more about how they move in *Schmidtea*. We imaged migrating cells after wounding and compared this to cells remaining in the shielded region that were static. We observed a significantly higher frequency of individual stem cells and stem cell progeny with extended cell processes in migratory regions of injured animals than in animals that were uninjured or for cells in the shielded region were not actively migrating (Figure 4A-D, see Supplementary Figure 4A-D for examples of cells with and without processes). We did not observe any connection or alignment between cells with extended processes demonstrating individual cells migrate independently with mesenchymal cell like morphology rather than any mechanism involving collective movement of cells requiring cell-cell junction contact. This observation suggests that cell migration may involve cellular mechanisms similar to those used during classical epithelial to mesenchymal transition (EMT). While net movement of cells is towards the wound site, we note that cell processes can extend in all directions, not just towards the wound (Figure 4C and E-H).

### **The arrangement of cell migration toward wounds recapitulates known cell lineages**

Ongoing planarian research has begun to reveal the details of planarian stem cell and progeny lineages, in particular uncovering heterogeneity of gene expression in the cycling cell fraction that very likely represents underlying functional heterogeneity and lineage commitment<sup>4</sup>.

Thus, we can use the cell type markers from these studies now that allows us to label different populations of cycling cells and stem cell progeny, particularly for the epidermal lineage. We know that some *smedwi-1*<sup>+</sup> stem cells shows elevated expression of *Smed-soxP-1*, *Smed-soxP-2* (called sigma-class neoblasts) and give rise to another class of *smedwi-1*<sup>+</sup> cells that express discrete set of genes like *Smed-zfp-1*, *Smed-fgfr-1*, *Smed-soxP-3*, and *Smed-egr-1* (called zeta-class neoblasts), these in turn produce *prog1*<sup>+</sup> cells that eventually begin to express the later progeny marker *agat-1*, at least some of which go on to form epidermal cells<sup>4</sup>.

We investigated the expression of these markers in migrating cells using a series of double WFISH experiments. These allowed us to measure the extent of migration of each of these cell types to begin to understand the relationship between migration and differentiation. Using this approach we are able to demonstrate a trend between the extent of migration and the extent of cellular differentiation (Figure 5A-J). This suggests that these processes are linked by underlying mechanisms and that as stem cells migrate they divide to give daughter cells that migrate and differentiate. We see a clear trend that migration distance increases with later markers of the epidermal lineage, in particular we see a significant difference between *smedwi-1* positive zeta class cells (zeta-class neoblasts) and *smedwi-1* negative zeta class cells, which is a likely demarcation between migrating cycling cells and non-cycling progeny (Figure 5G, H, K). We note that, this pattern recapitulates what is observed in the early regeneration blastema, where cycling cells do not enter until later after fully differentiated structures start to form.

# **RNAi in the context of shielded irradiation reveal a matrix metalloprotease and a snail transcription factor are required for cell migration to wound sites.**

Having provided a detailed description of cell migration in *Schmidtea* and uncovered previously un-described behaviors we next wished to test if we could study gene function in the context of migration. Previous research had attempted to implicate a *Smed-MMPa* (*MMPa*), one of four matrix metalloprotease enzymes identifiable in the *Schmidtea* genome, as having possible role in cell migration<sup>30</sup>. We decided to look at the function of this gene in the context of our migration assay. We first performed RNAi in the context of normal regeneration and amputation, and observed that *MMPa*(RNAi) animals showed regeneration defects as previously described, with failure to correctly regenerate anterior or posterior tissues (Supplementary Figure 5A)<sup>30</sup>. We then performed RNAi and amputation in the context of our assay and observed that anterior tissues regressed and that regeneration subsequently

failed (Supplementary Figure 5B). We used WFISH to monitor the movement of *smedwi-1*<sup>+</sup> stem cells and *progl*<sup>+</sup> stem cell progeny after *MMPa(RNAi)*, and observed very little migration of cells compared to control *GFP(RNAi)* worms (Figure 6A, D, J). Additionally we measured the morphology of stem cells and stem cell progeny and observed greatly reduced numbers of cells with extended processes compared to migrating cells in the *GFP(RNAi)* control animals (Figure 6B, C, E, F and K). These results confirm that this matrix metalloprotease enzyme is required to facilitate cell migration in planarians and demonstrate the potential utility of our assay in generating insights into how stem cell migration is controlled.

We next considered if we could establish a broad comparative context for the control between cell migration in planarians and migration in other systems including mammals. Our observation that cells appear to migrate individually using cell extensions to likely interact with the extracellular matrix and neighboring cells suggested that these cells may use similar mechanisms to those attributed to EMT<sup>31</sup>. In different model organisms EMT during embryogenesis and during the progression of tumors requires the activity of Snail family transcription factors<sup>32–34</sup>. We decided to test whether any planarian snail transcription factors could be involved in cell migration. Previously a snail family transcription factor, *Smed-snail* (*snail*) has been reported as being expressed in collagen positive muscle cells, in very small percentage of G2/M stem cells before wounding and ~35% of G2/M cells after wounding<sup>35</sup>. To our knowledge no phenotype has been reported for a snail family gene in planarians and when we performed *snail(RNAi)* with a standard regenerative assay we observed no phenotype, and all animals regenerated normally (Supplementary Figure 5A). When we performed *snail(RNAi)* in the context of our migration assay animals failed to regenerate suggesting a defect in cell migration (Supplementary Figure 5B). Using WFISH experiments we observed a clear decrease in the extent of cell migration compared to *GFP(RNAi)* animals (Figure 6A, G and J). This defect in migration of both stem cells and stem cell progeny was accompanied a decrease in the number of cells with cell extensions, suggesting that migratory mechanisms are effected by *snail(RNAi)* (Figure 6B, C, H, I and K). Finally we note that in *snail(RNAi)* animals the normal ratio of stem cells to stem cell progeny is not restored in the migratory region (Figure 6L). These defects relative to controls suggest that a snail transcription factor in planarians may have a conserved role in regulating cell migration. Our data suggest that our assay now facilitates the use of planarians as a model system to study the migration of cells during regeneration and that many processes are likely to conserved with

other animals, potentially including those processes that contribute to tumor development during cancer progression.

# ***Notum* is required for anterior cell migration in intact animals, but not after wounding.**

Having established that our assay allows the observation of migratory stem cell behavior, can be combined the application of RNAi and that the function of *snail*, a key regulator of migration in many contexts, is conserved we next turned our attention to potential migratory signals. Our experiments have established, in agreement with previous work, that wounding at a distance triggers migration of stem cells and stem cell progeny. In addition we have shown that in the absence of wounding, cells close to the anterior can still migrate into anterior regions. By analogy with other systems there are clearly a large number of conserved candidate pathways that could be involved in propagating the wound signal to allow migration or signals involved in allowing anterior migration in the absence of wounding. In our initial establishment of our approach we chose to study two candidate molecules, *Smed-wnt1* (*wnt1*) and *Smed-notum* (*notum*) that both seemed very likely candidates to be involved in both the wound signal and anterior migration in the absence of wounding.

It has been previously shown that wounding at any sites results in the transcriptional expression of *wnt1* in muscle cells at the wound site<sup>36</sup>. Given that Wnt signaling has a role in regulating cell migration<sup>37,38</sup>, we hypothesized that Wnt1 resulting from wound-induced expression could be required for normal migration. We performed *wnt1(RNAi)* and observed full penetrance of the tailless phenotype previously described for these animals (Supplementary Figure 5A)<sup>36</sup>. However, in the context of our migration assay we observed no effects on anterior migration after wounding suggesting *wnt1*, despite having wound induced expression has no essential role in this process (Figure 7A-C and G-K).

*Smed-notum* is also expressed in muscle cells on wounding, but only at anterior facing wounds where it is required to ensure the proper specification of anterior fates, probably by repressing Wnt signaling<sup>39</sup>. Additionally it has a homeostatic expression pattern at the anterior margin and has previously been shown to promote the homeostasis and correct size of the brain in combination with the activity of a *wnt11-6* gene expressed in posterior brain regions<sup>29</sup>. On this basis *notum* represents a candidate molecule for both wound induced migration and migration of cells in anterior regions. We performed *notum(RNAi)* and observed full penetrance of the double tailed phenotype previously described for these

animals in a standard regeneration assay (Supplementary Figure 5A)<sup>39</sup>. After shielded irradiation and wounding we observed that animals recovered normally over a similar time and we observed no difference in migration of cells or migrating cell morphology using WFISH (Figure 7A-F, J and K). However, when using an anteriorly positioned shield, which led to anterior migration of cells in control intact *GFP(RNAi)* animals, we observed a significant reduction anterior migration in *notum(RNAi)* (Figure 7L-S). We note that this reduction is not accompanied by a difference in the number of cells with cell extensions, suggesting that *notum* may act by contributing a directional signal rather than one that activates migratory behavior of anteriorly positioned stem cells and stem cell progeny. These data suggest that *notum* is not essential for wound-induced cell migration but is required in the case of anterior migration in intact animals that we uncovered in this work. It seems likely that an the earlier description of a *notum/wnt11-6* regulatory circuit involved in homeostatic regulation of brain size may also have a broader role in the homeostatic maintenance of anterior regions that do not normally contain cycling stem cells.

## Discussion

### An X-ray shielded assay allows precise observation of cell migration and application of functional genomic approaches

Here we have established a robust and reliable method that allows the regenerative planarian model system to be used to study cell migration. During homeostasis as well as standard regeneration experiments, stem cells and stem cell progeny are always close to where they are required. Nonetheless, as with all metazoans reliant on adult stem cells, they must still move short distances as they move and adjust into the correct functional positions in the tissues and organs. In the case of very anterior region and the pharynx of the planarians body plan, that are devoid of dividing stem cells, homeostasis must be achieved by migration of stem cell progeny (Supplementary Figure 2A). However precise monitoring of this process is difficult as the migratory distances involved are short and so confidently inferring changes in migratory behavior as oppose to changes in, say, differentiation is not possible. Our X-ray shielded assay creates a ‘blank canvas’ into which migrating stem cells and stem cell progeny move and we can accurately assign relationships between migration, differentiation and proliferation of groups of these cells over time. The innovations we have made here compared

to earlier approaches<sup>7</sup> allow for a thinner shield, smaller worms to be irradiated and technical consistency over relatively large numbers of worms. This has allowed us to combine WFISH and RNAi approaches so that we can now leverage the strength of the planarian model to study cell migration. Combining these with assessment of gene expression in defined FACS sorted cell populations will make planarians a powerful model system for studying stem cell migration in a regenerative context<sup>40-42</sup>.

## **A detailed description of migratory behavior in a regenerative context**

In this work we have revealed a number of detailed properties of cell migration in planarians that can be used to help unpick the mechanisms controlling cell migration. We have shown that migration occurs in response to wounding or damaged tissue as previously described<sup>7</sup>, but we find that posteriorly positioned stripes of stem cells do not migrate until tissue has regressed towards them demonstrating damaged tissue only activates migration within a certain range. We also find that contrary to previous work that migration can occur without wounding or failure in tissue homeostasis for anteriorly positioned stem cells and stem cell progeny. This observation tallies with the absence of stem cells in anterior regions and the brain in intact animals, which means that a mechanism for encouraging significant homeostatic cell migration must exist. We also observe that migrating cells home precisely to wounds without initially recognizing other tissue regions lacking stem cells and stem cell progeny. The observations dorsal *prog1*<sup>+</sup> cells migrate more rapidly than ventrally positioned *prog1*<sup>+</sup> cells and that dorsal *smedwi-1*<sup>+</sup> cells migrate centrally along the midline and ventral *smedwi-1*<sup>+</sup> cells in more lateral regions likely reflect the nature of underlying signaling systems. Finally, improvements in in-situ hybridization methodology allow us to observe that in regions containing moving cells we can see a clear increase in the number of cells with pronounced cell extensions. Migrating cells are unconnected to other migrating cells, and together these observations give an EMT like characteristic to planarians cell migration, as oppose to other mechanism involving collective cell migration. Together these observations establish a set of basic phenotypic criteria that can be used to the study the genetic control of migration.

## **The relationship between stem cell migration, proliferation and differentiation**

Stem cell migration during normal healthy tissue homeostasis must be intricately linked to cell divisions, differentiation and integration of new cells to ensure dysfunctional aged and



damaged differentiated cells are successfully replaced. Studying this process *in vivo* during adult tissue homeostasis has proven to be challenging and remains limited to a few contexts. Clearly highly regenerative animal models represent an opportunity to study these processes, which together power regeneration. Thus, perhaps the most important observations facilitated by our assay are those concerning the relationships between migration, proliferation and differentiation.

We observe that stem cell progeny migrate in large numbers in an initial response to wounding and that proliferating stem cells accompany them in smaller numbers. In response to both wounding and homeostatic signals we observe that stem cells divide asymmetrically as they migrate, and that the divided progeny differentiate further while they migrate. This creates an order of migration that recapitulates the known differentiation process for the epidermal lineage (Figure 5L). We do not see any evidence that progeny slow down their differentiation process in order to reach first wound sites and then differentiate. Instead our observations broadly recapitulate cell behaviour observed during regeneration, in which progeny migrate to form the regeneration blastema where they complete differentiation and cycling cells follow later. Our analysis detects significant difference in migration between *smedwi-1*<sup>+</sup> cells and zeta class/*smedwi-1*<sup>-</sup> cells, which we interpret as, suggesting that newly minted progeny migrate ahead of cycling stem cells as they do in blastema formation. Stem cells may migrate more slowly on average as they stop to divide, as they require the presence of advanced progeny at certain density before they can be healthily maintained in a repopulating tissue region or simply perhaps because they are slower due to having smaller cell extensions. Based on these observations we note that our assay will provide an alternate method of assessing cell lineage relationships with WFISH approaches and when combined with RNAi it allows the molecular processes controlling the interplay between migration, proliferation and differentiation to be studied. For example, future experiments can test the requirement of migrating stem cells for stem cell progeny by interfering with differentiation or asymmetric division.

Related to the observation that the order of cell migration we observe recapitulates cell lineages is the question of whether all types of wound will result in the same or different combinations of migratory, proliferative and differentiation responses. While we have established that migration homes precisely to wound sites and we might expect differences in proliferative response to relate to those already described for regeneration, we can also study



if differentiation programs show specificity to the type of wounds depending on which cell types are damaged. Combining our assay with experimental paradigms that damage one or few defined cell types, for example taking advantage accessibility of the photoreceptors or drug targeting specific neuronal subsets, will help begin to answer how demands for new cells is regulated and how stem cells and their progeny sense and adjust to these demands. Given that these are likely to be the processes that decline in human age related disease or are mis-regulated during tumour progression, planarian experiments in this context may provide important new insights.

### **Conservation of *Snail* function and the potential to study processes relevant to tumor formation.**

The fact that cells appear to migrate individually and that in migratory regions increased numbers of cells have extended cell processes as opposed to a rounded morphology suggested molecular mechanisms associated with EMT may regulate migration. In order to begin to test this possibility we investigated the function of a planarian *Snail* family transcription factor, as this family is a key positive regulator cell migration during EMT, required to down regulate the expression of genes that encode proteins that maintain cell-cell contacts like E-cadherin and beta-integrins<sup>31</sup>. Enhanced *Snail* gene expression has reported in several different cancer types including ovarian carcinoma<sup>43</sup>, breast tumours<sup>44,45</sup>; gastric cancers<sup>46,47</sup>; hepatocellular carcinomas<sup>48,49</sup>; colon cancers<sup>50</sup>; uterine cervix cancer<sup>51</sup> and synovial sarcomas<sup>52</sup>. Overexpression or down regulation of *Snail* has shown to modulate invasiveness and metastasis in in vitro cancer cell culture studies<sup>51,53–59</sup>. These reports clearly suggest that *Snail* is key player in cancer invasion and metastasis.

We found no phenotype for this gene using RNAi and in a standard amputation regeneration assay; animals were able to regenerate normally. However, within the context of our assay *snail(RNAi)* led to failure in cell migration compared to controls and we were able to clearly observe decrease in cells showing extended cell processes, indicative of migratory morphology. Our data confirm the role of a snail family gene in controlling migration in the context for our assay and suggest we can use this as a basis for studying EMT related processes in planarians. Given that the inappropriate activity of EMT underpins key parts of cancer related pathology this will be an important future direction. By combining functional approaches with expression screens starting with *snail*, other planarian homologs of EMT-related transcription factor regulators and known upstream EMT regulatory signals, we will

be able to find out more about EMT in the context of tissue homeostasis and stem cell activity.

## **A role for *notum* in homeostatic migration of stem cells stem cell progeny.**

The precise identity of the signals that trigger migration after wounding remains an open question. It seems more than likely that many overlapping signals cooperate to ensure migration occurs correctly and it is likely to include signals associated primarily with occurrence of damage as well as signals from specific tissues that require specific progeny. Two genes that have already been shown to have complementary roles in controlling the polarity of planarian regeneration, *wnt-1* and *notum*, are both known to be wound induced<sup>39</sup> and represented good candidates for potential roles in cell migration after wounding. In addition homeostatic expression of *notum* was recently shown to be involved in regulating planarian brain size in combination with *wnt11-6*, and specifically ensuring that sufficient neural precursors are produced to maintain the correct brain size<sup>29</sup>. These observations therefore also make *notum* a candidate for involvement in the homeostatic cell migration that we described in intact animals in anterior regions.

Using RNAi we found no role for either *wnt-1* or *notum* in wound induced migration, however we found that *notum* required for the homeostatic anterior migration. Given the homeostatic expression of *notum* transcript and the observation that cells migrate homeostatically within a certain distance from the anterior tip of the animal, we propose that a gradient of *notum* somehow provides directional cues to migrating cells. We note that, the formation of cell extensions is not effected by *notum*(RNAi), suggesting that other signals maybe responsible for this aspect of migratory activity while *notum* provides a directional cue. *notum* in planarians, mammals and flies has been implicated as a Wnt signaling inhibitor<sup>60-62</sup>, so it is possible that inhibition of local homeostatic levels of Wnt signaling, specifically of anteriorly expressed planarian Wnts (*wnt11-6* and *wnt5*) may then allow homeostatic migration. Future work with our assay will aim to understand the mechanism by which *notum* facilitates homeostatic migration and it's relationship with wound induced migration.

## **Materials and methods**

### **Planarian culture:**

*A Schmidtea mediterranea* asexual strain was cultured and maintained in 0.5% instant ocean water in the dark at 20°C. Animals were starved at least 7 days before using for experiments.

## **X-ray irradiation, and design of shield**

Irradiations were performed using a Comet MXR-321 x-ray set operated at 225 kVp, 17mA with a 0.5 mm aluminium filter. The X-ray field is collimated to 40 mm x 20 mm with a 6.1 mm thick lead disc positioned centrally, directly above the X-ray tube focal spot and supported within an aluminium frame. The removable central shielded area is achieved using a 0.8 mm wide, 6.1 mm thick lead strip spanning the long axis of the collimated field, this sits slightly proud of the main lead collimator so that it is in contact with the base of the Petri dish. When in position, the worms are irradiated at a dose rate of 23 Gy/min, reducing to ~ 1 Gy/min underneath the shielded region. The variation in dose distribution across the strip is shown in supplementary figure 1C. The circular hole in the top aluminium plate corresponds to the outside diameter of the Petri dish and enables dishes to be positioned quickly and reproducibly. Thin strips of materials such as tungsten or tantalum could be used to replace the lead strip to achieve thinner shielded regions if required.

## **Dosimetry**

Dose rate measurements and spatial characterization of the treatment field was performed using Gafchromic EBT3 film (International Specialty products, Wayne, NJ) placed in the base of an empty 60 mm Petri dish. Twenty-four hours following exposure the EBT3 film was scanned in transmission mode at 48 bit RGB (16 bits per colour) with 300 dpi resolution using a flatbed scanner (Epson Expression 10000XL). A template was used to position the film within the scanner and the scanning direction was kept constant with respect to the film orientation, as recommended in the manufacturer's guidelines. The dose was calculated using the optical density of the red channel and corrected using the optical density of the blue channel in order to compensate for small non-uniformities in the film which cause false apparent variations in dose (as described in the technical brief: *Gafchromic EBT2 Self-developing film for radiotherapy dosimetry*). The batch of EBT3 film was calibrated following the recommendations of the report of AAPM Task Group 61<sup>63</sup>.

## **Shielded irradiation:**

Up to 20 size-matched planarians (3 to 4 mm) were anesthetized in ice cold 0.2% chloretone and aligned on 60mm Petri dish<sup>64</sup>. Anterior tip of all worms were aligned in a perfect line to keep the absolute migratory distance (distance between tip of the head and shielded region) fixed. Petri dish is pre-marked with a line at bottom denoting the place and dimensions (length and thickness) of the shield strip. Excess liquid is removed to minimize movement of worms during at the time of irradiation. Petri dish containing worms is then placed on to the shield of bottom source X-ray irradiator. Care is taken to perfectly match the position of shield trip and line marked on Petri dish to ascertain the exact region of the worm to be shielded. 30Gy X-ray (225kV for 1 min 18 seconds) is used for irradiation. Once irradiation is over, planarians were immediately washed with instant ocean water and transferred into fresh instant ocean water and incubated in dark at 20°C.

#### **WFISH, immunostaining and imaging**

Whole mount fluorescent in-situ hybridization was performed as described previously<sup>65,66</sup>. H3ser10p rabbit monoclonal antibody from Millipore (04–817) was used for immunostaining<sup>67</sup>. Confocal imaging was done with Olympus FV1000 and Zeiss 880 Airyscan microscope. Bright field images were taken with Zeiss Discovery V8 from Carl Zeiss using Canon 1200D camera. Images were processed with Fiji and Adobe Photoshop. ZEN 2.1 (blue edition) software from Carl Zeiss was used to construct 3D images of cells. All measurements and quantifications were done with Fiji and Adobe Photoshop. Significance was determined by unpaired 2-tailed Student's t-test.

#### **Gene cloning and RNAi**

Planarian genes were cloned into the pPR-T4P plasmid vector containing opposable T7 RNA polymerase promoters (kind gift from Jochen Rink). The cloned vectors were then used for in vitro dsRNA synthesis and probe synthesis as described previously<sup>65,68</sup>. Previously described sequence regions were used for dsRNA synthesis of *MMPa*<sup>30</sup>, *Wnt1*<sup>36</sup> and *Notum*<sup>39</sup>. *Snail* dsRNA was synthesized by using forward primer GTTATCAAGCCAGACCTTCA and reverse primer GTTTGACTTGTGAATGGGTC. Reported sequences were used for riboprobe synthesis of *smewi-1*<sup>69</sup>, *prog-1*<sup>18</sup>, *agat-1*<sup>18</sup>, zeta pool<sup>4</sup>, and sigma pool<sup>4</sup>. For knockdown of genes animals were injected with 3 x 32nl of dsRNA 6 times over 2 weeks. If worms need to be used for shielded irradiation after RNAi, a 1-day gap was kept between last RNAi injection and the shielded irradiation.

566

## 567 **Acknowledgments**

568 We thank all members of the Aboobaker lab past and present for discussions and reagent  
569 sharing.

570

## 571 **Funding**

572 The work of PA, EA, NK, AAA is funded by the MRC (grant number MR/M000133/1),  
573 BBSRC (grant number BB/K007564/1), the John Fell Fund Oxford University Press (OUP),  
574 and a small grant from the CRUK Oxford Centre. NK is funded by a Marie Curie Sklodowska  
575 fellowship funded by Horizon 2020. MH and JT acknowledge funding from the Funding from  
576 Medical Research Council Strategic Partnership Funding (MC-PC-12004) for the  
577 CRUK/MRC Oxford Institute for Radiation Oncology is gratefully acknowledged.

578

## 579 **References**

- 580 1. Gehrke, A. R. & Srivastava, M. Neoblasts and the evolution of whole-body  
581 regeneration. *Curr. Opin. Genet. Dev.* **40**, 131–137 (2016).
- 582 2. Tanaka, E. M. Regeneration: if they can do it, why can't we? *Cell* **113**, 559–62 (2003).
- 583 3. Wagner, D. E., Wang, I. E. & Reddien, P. W. Clonogenic neoblasts are pluripotent  
584 adult stem cells that underlie planarian regeneration. *Science* **332**, 811–6 (2011).
- 585 4. van Wolfswinkel, J. C., Wagner, D. E. & Reddien, P. W. Single-Cell Analysis Reveals  
586 Functionally Distinct Classes within the Planarian Stem Cell Compartment. *Cell Stem*  
587 *Cell* **15**, 326–339 (2014).
- 588 5. Reig, G., Pulgar, E. & Concha, M. L. Cell migration: from tissue culture to embryos.  
589 *Development* **141**, 1999–2013 (2014).
- 590 6. Bradshaw, B., Thompson, K. & Frank, U. Distinct mechanisms underlie oral vs aboral  
591 regeneration in the cnidarian *Hydractinia echinata*. *Elife* **4**, (2015).
- 592 7. Guedelhofer, O. C. & Sánchez Alvarado, A. Amputation induces stem cell  
593 mobilization to sites of injury during planarian regeneration. *Development* **139**, 3510–  
594 20 (2012).

- 595 8. Friedl, P. & Gilmour, D. Collective cell migration in morphogenesis, regeneration and  
596 cancer. *Nat. Rev. Mol. Cell Biol.* **10**, 445–57 (2009).
- 597 9. Feng, L., Wei, W., Heng, Z., Yantao, H. & Chunbo, W. Knockdown of REV7 Inhibits  
598 Breast Cancer Cell Migration and Invasion. *Oncol. Res.* **24**, 315–325 (2016).
- 599 10. Goichberg, P. Current Understanding of the Pathways Involved in Adult Stem and  
600 Progenitor Cell Migration for Tissue Homeostasis and Repair. *Stem Cell Rev.* **12**, 421–  
601 37 (2016).
- 602 11. Friedl, P., Locker, J., Sahai, E. & Segall, J. E. Classifying collective cancer cell  
603 invasion. *Nat. Cell Biol.* **14**, 777–83 (2012).
- 604 12. Friedl, P. & Alexander, S. Cancer invasion and the microenvironment: plasticity and  
605 reciprocity. *Cell* **147**, 992–1009 (2011).
- 606 13. Ridley, A. J. *et al.* Cell migration: integrating signals from front to back. *Science* **302**,  
607 1704–9 (2003).
- 608 14. Montell, D. J. Border-cell migration: the race is on. *Nat. Rev. Mol. Cell Biol.* **4**, 13–24  
609 (2003).
- 610 15. Geisbrecht, E. R. & Montell, D. J. Myosin VI is required for E-cadherin-mediated  
611 border cell migration. *Nat. Cell Biol.* **4**, 616–20 (2002).
- 612 16. Sato, K. *et al.* Left-right asymmetric cell intercalation drives directional collective cell  
613 movement in epithelial morphogenesis. *Nat. Commun.* **6**, 10074 (2015).
- 614 17. Hagedorn, E. J. *et al.* The netrin receptor DCC focuses invadopodia-driven basement  
615 membrane transmigration in vivo. *J. Cell Biol.* **201**, 903–13 (2013).
- 616 18. Eisenhoffer, G. T., Kang, H. & Sánchez Alvarado, A. Molecular analysis of stem cells  
617 and their descendants during cell turnover and regeneration in the planarian *Schmidtea*  
618 *mediterranea*. *Cell Stem Cell* **3**, 327–39 (2008).
- 619 19. Aboobaker, a A. Planarian stem cells: a simple paradigm for regeneration. *Trends Cell*  
620 *Biol.* **21**, 304–11 (2011).
- 621 20. Forsthoefel, D. J. & Newmark, P. a. Emerging patterns in planarian regeneration. *Curr.*  
622 *Opin. Genet. Dev.* **19**, 412–20 (2009).
- 623 21. Rink, J. C., Gurley, K. a, Elliott, S. a & Sánchez Alvarado, A. Planarian Hh signaling  
624 regulates regeneration polarity and links Hh pathway evolution to cilia. *Science* **326**,  
625 1406–10 (2009).
- 626 22. Reddien, P. W., Bermange, A. L., Kicza, A. M. & Sánchez Alvarado, A. BMP  
627 signaling regulates the dorsal planarian midline and is needed for asymmetric  
628 regeneration. *Development* **134**, 4043–51 (2007).

23. Wurtzel, O. *et al.* A Generic and Cell-Type-Specific Wound Response Precedes Regeneration in Planarians. *Dev. Cell* **35**, 632–45 (2015).
25. Wolff, E. Recent researches on the regeneration of planaria. in ‘*Regeneration. 20th Growth Symposium*’ (D. Rudnick, Ed) 53–84 (Ronald Press, 1962).
26. Dubois, F. Contribution à l’étude de la migration des cellules de régénération chez les Planaires dulcicoles. *Bull. Biol. Fr. Belg.* **83**, 213–283 (1949).
27. Tasaki, J., Uchiyama-Tasaki, C. & Rouhana, L. Analysis of Stem Cell Motility In Vivo Based on Immunodetection of Planarian Neoblasts and Tracing of BrdU-Labeled Cells After Partial Irradiation. *Methods Mol. Biol.* **1365**, 323–38 (2016).
28. Pearson, B. J. *et al.* Formaldehyde-based whole-mount in situ hybridization method for planarians. *Dev. Dyn.* **238**, 443–50 (2009).
29. Hill, E. M. & Petersen, C. P. Wnt/Notum spatial feedback inhibition controls neoblast differentiation to regulate reversible growth of the planarian brain. *Development* (2015). doi:10.1242/dev.123612
30. Isolani, M. E. *et al.* Planarians as a Model to Assess In Vivo the Role of Matrix Metalloproteinase Genes during Homeostasis and Regeneration. *PLoS One* **8**, (2013).
31. Thiery, J. P. & Sleeman, J. P. Complex networks orchestrate epithelial-mesenchymal transitions. *Nat. Rev. Mol. Cell Biol.* **7**, 131–42 (2006).
32. Colvin Wanshura, L. E., Galvin, K. E., Ye, H., Fernandez-Zapico, M. E. & Wetmore, C. Sequential activation of Snail1 and N-Myc modulates sonic hedgehog-induced transformation of neural cells. *Cancer Res.* **71**, 5336–45 (2011).
33. Battle, E. *et al.* The transcription factor snail is a repressor of E-cadherin gene expression in epithelial tumour cells. *Nat. Cell Biol.* **2**, 84–9 (2000).
34. Cano, J. *et al.* The transcription factor snail controls epithelial-mesenchymal transitions by repressing E-cadherin expression. *Nat. Cell Biol.* **2**, 76–83 (2000).
35. Scimone, M. L., Kravarik, K. M., Lapan, S. W. & Reddien, P. W. Neoblast Specialization in Regeneration of the Planarian *Schmidtea mediterranea*. *Stem cell reports* **3**, 339–352 (2014).
36. Petersen, C. P. & Reddien, P. W. A wound-induced Wnt expression program controls planarian regeneration polarity. *Proc. Natl. Acad. Sci. U. S. A.* **106**, 17061–6 (2009).
37. Vlad-Fiegen, A., Langerak, A., Eberth, S. & Müller, O. The Wnt pathway destabilizes adherens junctions and promotes cell migration via  $\beta$ -catenin and its target gene cyclin D1. *FEBS Open Bio* **2**, 26–31 (2012).
38. Aman, A. & Piotrowski, T. Wnt/beta-catenin and Fgf signaling control collective cell



- migration by restricting chemokine receptor expression. *Dev. Cell* **15**, 749–61 (2008).
39. Petersen, C. P. & Reddien, P. W. Polarized notum activation at wounds inhibits Wnt function to promote planarian head regeneration. *Science* **332**, 852–5 (2011).
40. Romero, B. T., Evans, D. J. & Aboobaker, A. A. in (eds. Mace, K. A. & Braun, K. M.) **916**, 167–179 (Humana Press, 2012).
41. Hayashi, T. & Agata, K. A unique FACS method to isolate stem cells in planarian. *Methods Mol. Biol.* **879**, 29–37 (2012).
42. Solana, J. *et al.* Defining the molecular profile of planarian pluripotent stem cells using a combinatorial RNAseq, RNA interference and irradiation approach. *Genome Biol.* **13**, R19 (2012).
43. Davidson, B., Tropé, C. G. & Reich, R. Epithelial-mesenchymal transition in ovarian carcinoma. *Front. Oncol.* **2**, 33 (2012).
44. Blanco, M. J. *et al.* Correlation of Snail expression with histological grade and lymph node status in breast carcinomas. *Oncogene* **21**, 3241–6 (2002).
45. Elloul, S. *et al.* Snail, Slug, and Smad-interacting protein 1 as novel parameters of disease aggressiveness in metastatic ovarian and breast carcinoma. *Cancer* **103**, 1631–43 (2005).
46. Peng, Z., Wang, C.-X., Fang, E.-H., Wang, G.-B. & Tong, Q. Role of epithelial-mesenchymal transition in gastric cancer initiation and progression. *World J. Gastroenterol.* **20**, 5403–10 (2014).
47. Rosivatz, E. *et al.* Differential expression of the epithelial-mesenchymal transition regulators snail, SIP1, and twist in gastric cancer. *Am. J. Pathol.* **161**, 1881–91 (2002).
48. Miyoshi, A. *et al.* Snail accelerates cancer invasion by upregulating MMP expression and is associated with poor prognosis of hepatocellular carcinoma. *Br. J. Cancer* **92**, 252–8 (2005).
49. Sugimachi, K. *et al.* Transcriptional repressor snail and progression of human hepatocellular carcinoma. *Clin. Cancer Res.* **9**, 2657–64 (2003).
50. Pálmer, H. G. *et al.* The transcription factor SNAIL represses vitamin D receptor expression and responsiveness in human colon cancer. *Nat. Med.* **10**, 917–9 (2004).
51. Myong, N.-H. Loss of E-cadherin and Acquisition of Vimentin in Epithelial-Mesenchymal Transition are Noble Indicators of Uterine Cervix Cancer Progression. *Korean J. Pathol.* **46**, 341–8 (2012).
52. Saito, T. *et al.* E-cadherin mutation and Snail overexpression as alternative mechanisms of E-cadherin inactivation in synovial sarcoma. *Oncogene* **23**, 8629–38 (2004).

53. Horvay, K. *et al.* Snail regulates cell lineage allocation and stem cell maintenance in the mouse intestinal epithelium. *EMBO J.* **34**, 1319–35 (2015).
54. Adhikary, A. *et al.* Inhibition of epithelial to mesenchymal transition by E-cadherin up-regulation via repression of slug transcription and inhibition of E-cadherin degradation: dual role of scaffold/matrix attachment region-binding protein 1 (SMAR1) in breast cancer cells. *J. Biol. Chem.* **289**, 25431–44 (2014).
55. Smith, B. N. *et al.* Snail promotes epithelial mesenchymal transition in breast cancer cells in part via activation of nuclear ERK2. *PLoS One* **9**, e104987 (2014).
56. Sharili, A.-S., Allen, S., Smith, K., Price, J. & McGonnell, I. M. Snail2 promotes osteosarcoma cell motility through remodelling of the actin cytoskeleton and regulates tumor development. *Cancer Lett.* **333**, 170–9 (2013).
57. Villarejo, A. *et al.* Loss of Snail2 favors skin tumor progression by promoting the recruitment of myeloid progenitors. *Carcinogenesis* **36**, 585–97 (2015).
58. Fan, F. *et al.* Overexpression of snail induces epithelial-mesenchymal transition and a cancer stem cell-like phenotype in human colorectal cancer cells. *Cancer Med.* **1**, 5–16 (2012).
59. Belgiovine, C. *et al.* Snail levels control the migration mechanism of mesenchymal tumor cells. *Oncol. Lett.* **12**, 767–771 (2016).
60. Zhang, X. *et al.* Notum is required for neural and head induction via Wnt deacylation, oxidation, and inactivation. *Dev. Cell* **32**, 719–30 (2015).
61. Kakugawa, S. *et al.* Notum deacylates Wnt proteins to suppress signalling activity. *Nature* **519**, 187–92 (2015).
62. Traister, A., Shi, W. & Filmus, J. Mammalian Notum induces the release of glypicans and other GPI-anchored proteins from the cell surface. *Biochem. J.* **410**, 503–11 (2008).
63. Ma, C. M. *et al.* AAPM protocol for 40-300 kV x-ray beam dosimetry in radiotherapy and radiobiology. *Med. Phys.* **28**, 868–93 (2001).
64. Guedelhofer, O. C. & Sánchez Alvarado, A. Planarian immobilization, partial irradiation, and tissue transplantation. *J. Vis. Exp.* 1–7 (2012). doi:10.3791/4015
65. King, R. S. & Newmark, P. a. In situ hybridization protocol for enhanced detection of gene expression in the planarian *Schmidtea mediterranea*. *BMC Dev. Biol.* **13**, 8 (2013).
66. Currie, K. W. *et al.* HOX gene complement and expression in the planarian *Schmidtea mediterranea*. *Evodevo* **7**, 7 (2016).
67. Felix, D. a & Aboobaker, a A. The TALE class homeobox gene *Smed-prep* defines the

anterior compartment for head regeneration. *PLoS Genet.* **6**, e1000915 (2010).

68. Rouhana, L. *et al.* RNA interference by feeding in vitro-synthesized double-stranded RNA to planarians: methodology and dynamics. *Dev. Dyn.* **242**, 718–30 (2013).

69. Reddien, P. W., Oviedo, N. J., Jennings, J. R., Jenkin, J. C. & Sánchez Alvarado, A. SMEDWI-2 is a PIWI-like protein that regulates planarian stem cells. *Science* **310**, 1327–30 (2005).

## Figure Legends

### Figure 1. Shielded irradiation assay setup:

(A) Point source X-ray irradiator with the lead shield on top and holding worms aligned in a Petri dish.

(B) Worms anesthetized in 0.2% chloretone and aligned in a straight line on 60mm Petri dish.

(C) Lead shield with a horizontal lead stripe in the middle.

(D-E) Wild type un-irradiated planarians showing distribution of stem cells (green) and early progeny (magenta) (D). Striped planarians at 4 days post shielded irradiation (4dpi) showing band of stem cells (green) and early progeny (magenta) restricted in irradiation-protected region (E). 30 Gy X-ray is used.

(F) Gradual loss of stem cells (green) and early progeny (magenta) from non-shielded region after 1 dpi, 2dpi, 3dpi and 4dpi respectively (n=10).

### Supplementary Figure 1. Parts and dimensions of lead shield assembly:

(A) Lead strip and lead shield are assembled with aluminium support which further covered with aluminium disc to support Petri dish in the final lead shield assembly.

(B) Dimensions of lead shield and lead strip from top and side view. Unit: mm.

(C) Dose distribution across the lead strip showing greater than 94% attenuation of X-ray dose under the lead strip protected region.

### Figure 2. Anterior migration and repopulation of stem cells and stem cell progeny in uninjured animals:

(A) Cartoon showing strategy of shielding worms at various places along the anterior-posterior axis.

(B-J) Bright field images of worms shielded at 3 different places posterior (B, C), middle (E, F) and anterior (H, I) in shielded irradiation assay showing regression and recovery over the time. Bright field images show head regression in posteriorly shielded worms (B), head and tail regression in middle shielded worms (E) and tail regression in anteriorly shielded worm (H). As cells migrate and repopulate the regressed anterior and posterior regions recovered over the time in all posterior (C), middle (F) and anterior (I) shielded worms (n=20 per time point). Scale bars: 500µm.

(D, G, J) FISH showing no migration of stem cells (green) and early progeny (magenta) in posteriorly shielded worms (D) until anterior tissue regress close enough to the shielded region. Whereas stem cells (green) and early progeny (magenta) migrate and repopulate in the anterior direction in some middle (G) and anteriorly (J) shielded worms (n=20 per time point). Migration takes less time in anteriorly placed shields. Scale bars: 500µm.

(K) Measurements of distance migrated by stem cells (green) and early progeny (magenta) in the worms shielded irradiated at different places along AP axis. Each dot represent distance migrated by individual cell in each animal. Distance of 10 most distal cells of each class is measured from each animal (n=16).

(L) Model showing gradient of signal (orange) form head tip to up to ~1300µm towards posterior.

## **Supplementary Figure 2. Distribution of stem cells in intact and regenerating animals:**

(A) FISH showing distribution of stem cells (green) in intact wild type worm. Stem cells are absent in the pharynx region, in brain region and region anterior to photoreceptors (\*). Scale bar: 500µm.

(B) FISH showing that stem cells (green) are absent in the early regenerative blastema in a tail fragment regenerating at 3dpa (n=5 per time point). Scale bar: 200µm.

## **Figure 3. Migration and repopulation of stem cells and stem cell progeny in decapitated animals:**

(A) Model demonstrating three different ways to measure distance of migrating cell. I) Distance migrated by cell = distance between anterior boundary of the shielded region and migrating cell (X), II) Distance migrated by cell = distance between posterior boundary of the shielded region and migrating cell (X) – 0.8mm (length of the shielded region), III) Distance migrated by cell = distance between posterior boundary of shielded region and anterior tip (Y) – distance between anterior tip and migrating cell (X) – 0.8mm (length of the shielded region).

(B) FISH showing migration and repopulation of stem cells (green) and early progeny (magenta) at 1, 4, 7 and 10 days post decapitation (n=10 per time point). Scale bars: 500µm.

(C) Measurements of distance migrated by stem cells (green) and early progeny (magenta) at 1, 4, 7 and 10 days post decapitation. Each dot represent average distance migrated by 10 most distal cells in each animal (n=25 per time point). Lines and error bars indicate mean and SD.

(D) Stem cell to early progeny ratio in the migratory region is plotted at 1, 4, 7 and 10 days post decapitation (n=10 per time point). Ratio of cells in shielded region and in unexposed worm is used as control. The results are expressed as means  $\pm$ SD.

(E) Quantification of stem cells (magenta) and mitotic cells (green) in the migratory region following decapitation at 1, 4, 7 and 10 days (n=10 per time point). The results are expressed as means  $\pm$ SD.

### **Supplementary Figure 3. Mitotic activity and other general features of cell migration in planarians:**

(A) H3P immunostaining shows increase in mitotic cells (yellow) in the migratory region over the time course, 1dpa, 4dpa, 7dpa and 10dpa (n=5 per time point). Scale bar: 500µm.

(B) Graph showing increasing distance of mitotic cells (magenta dots) from the shielded region over the time course, 1dpa, 4dpa, 7dpa and 10dpa (n=5 per time point). Each dot represents the distance of individual H3P cell from the shielded region. 5 most distal H3P cells were considered for measurements from each animal. Lines and error bars indicate mean and SD.

(C, D) Stem cells (green) and early progeny (magenta) show directional migration towards the site of poking (C) and notch (D).

(E) Stem cells (green) and early progeny (magenta) from the dorsal side migrate more rapidly than the ventral side. Scale bar: 100µm.

(F) Measurements of distance migrated by stem cells (green) and early progeny (magenta) from dorsal and ventral side. Each dot represents average the distance migrated by 10 most distal cells in an animal (n=5). Lines and error bars indicate mean and SD.

(G) Montage showing migrating stem cells (green) in different planes from dorsal to ventral side.

### **Figure 4. Stem cells and early progeny show extended cytoplasmic projections during migration:**

(A) Morphology of cells within the shielded region in an uninjured worm shows very few stem cells (green) and few early progeny cells (magenta) with extended cytoplasmic projections (n=10).

(B) Morphology of cells within the shielded region in the decapitated worm shows few stem cells (green) and some early progeny cells (magenta) with extended cytoplasmic projections (n=10).

(C) Morphology of cells within the migratory region in the decapitated worm shows few stem cells (green) and many early progeny cells (magenta) with extended cytoplasmic projections (n=10).

(D) Quantification shows increase in number of stem cells (green) and early progeny cells (magenta) with extended processes within decapitated/migratory region as well as decapitated/shielded region compared to the uninjured/shielded region (n=10 per condition). The results are expressed as means  $\pm$ SD. Student's t test: \*p<0.05.

(E-H) Early progeny cells (magenta) within migratory region in decapitated worms shows extended processes in various directions. Yellow arrows indicate the direction of extended processes.

#### Supplementary Figure 4. Different shapes of cells:

(A-B) Morphology of stem cells (green) and early progeny (magenta) without and with extended processes.

#### Figure 5. Migration of different epidermal lineage cells shows that cells migrate in the specific order with most differentiated cells leading to the least differentiated cells:

(A-J) FISH showing migration of different cell types in epidermal lineage at 7dpa. *Agat-1* cells (magenta) migrate way ahead of *smedwi-1* cells (green) (A, B). *prog-1* cells (magenta) migrate way ahead of *smedwi-1* cells (green) (C, D). *prog-1* cells (magenta), Zeta class cells (green) and *prog-1* + Zeta class double positive cells (white) migrate with the similar speed (E, F). *smedwi-1* negative zeta class cells (magenta) migrate way ahead of *smedwi-1* positive zeta stem cells (white) and *smedwi-1* cells (green) (G, H). *smedwi-1* positive sigma stem cells (white) and *smedwi-1* cells (green) migrate with the similar speed (I, J) (n=5 per condition). White arrows indicate the examples of double positive cells. Scale bars: 300 $\mu$ m for zoomed out and 100 $\mu$ m for zoomed in view.

(K) Measurements of distance travelled by different cell populations (*smedwi-1* positive sigma class stem cells, *smedwi-1* positive zeta class stem cells, *smedwi-1* negative zeta class cells,



*prog-1* + zeta class double positive cells, *prog-1* cells and *agat-1* cells) in decapitated worms at 7dpa. (n=5 per condition, Student's t test: \*p<0.05)

(L) Model demonstrating order in which different cells migrate following decapitation. *Agat-1*, *prog-1*, *prog-1* + zeta class double positive cells migrate most anteriorly and are most distal to the shielded region. Zeta class (*smedwi-1*) cells migrate equally with *prog-1*, *prog-1* + zeta class double positive cells but are quite distant to *agat-1* cells. Zeta stem cells and sigma stem cells migrate with the slowest speed and are most proximal to the shielded region.

#### **Figure 6. *MMPa*, *Snail* RNAi inhibit cell migration:**

(A-I) FISH shows migration of stem cells (green) and early progeny (magenta) at 7dpa in GFP RNAi (A-C) worms but the migration is inhibited in *MMPa*(RNAi) (D-F) and reduced in *SNAIL*(RNAi) (G-I) worms. Insets show the presence of stem cells (green) and early progeny (magenta) with extended cytoplasmic projections in migratory region of *GFP*(RNAi) worms (B, C) but are almost absent in *MMPa*(RNAi) (E, F) and *SNAIL*(RNAi) (H, I) worms (n=5).

(J) Measurements of shows drastic decrease in the distance migrated by stem cells (green) and early progeny (magenta) at 7dpa in *MMPa*(RNAi) and *SNAIL*(RNAi) animals compared to *GFP*(RNAi) worms (n=5). Each dot represents the average distance migrated by 10 most distal cells from each animal. Lines and error bars indicate mean and SD. Student's t test: \*p<0.05.

(K) Quantification shows that stem cells (green) and early progeny (magenta) with extended processes are reduced significantly in *MMPa*(RNAi) and *SNAIL*(RNAi) animals in comparison with *GFP*(RNAi) animals at 7dpa (n=5). The results are expressed as means  $\pm$ SD. Student's t test: \*p<0.05.

(L) Quantification shows reduction in stem cell to early progeny ratio in *SNAIL*(RNAi) animals compared to *GFP*(RNAi) animals at 7dpa (n=5). Each dot represents the data from individual animal. Lines and error bars indicate mean and SD. Student's t test: \*p<0.05.

#### **Supplementary Figure 5. Bright field images showing penetrance of RNAi and its effect on regeneration:**

(A) Head, Trunk and Tail fragments regenerated at 11 days post amputation following *GFP*(RNAi), *MMPa*(RNAi), *SNAIL*(RNAi), *Wnt1*(RNAi) and *Notum*(RNAi). (n=10)

(B) Rescue and regeneration of *GFP*(RNAi), *MMPa*(RNAi) and *SNAIL*(RNAi) worms following shielded irradiation and decapitation. (n=30)



**Figure 7. Effect of Notum RNAi and Wnt1 RNAi on cell migration:**

(A-I) FISH showing migration of stem cells (green) and early progeny (magenta) at 7 days post decapitation in *GFP(RNAi)* (A-C) animals and is unaffected in *Notum(RNAi)* (D-F) and *Wnt-1(RNAi)* (G-I) animals. Insets show morphology of stem cells (green) and early progeny (magenta) in migratory region (B, C, E, F, H, I).

(J) Measurements show that distance migrated by stem cells (green) and early progeny (magenta) at 7 dpa in *GFP(RNAi)*, *Notum(RNAi)* and *Wnt-1(RNAi)* animals is similar (n=10). Each dot represents the average distance migrated by 10 most distal cells from each animal. Lines and error bars indicate mean and SD. Student's t test used for analysis.

(K) Quantification shows that the number of stem cells (green) and early progeny (magenta) with extended processes is unaffected in *Notum(RNAi)* and *Wnt-1(RNAi)* animals compared to *GFP(RNAi)* animals (n=10). The results are expressed as means  $\pm$ SD. Student's t test used for analysis.

(L-Q) FISH showing reduced migration of stem cells (green) and early progeny (magenta) at 10dpi in intact *Notum(RNAi)* (O-Q) animals compared to intact *GFP(RNAi)* (L-N) animals. Insets show morphology of stem cells (green) and early progeny (magenta) in migratory region (M, N, P, Q).

(R) Measurements show that distance migrated by stem cells (green) and early progeny (magenta) at 10dpi in *Notum(RNAi)* animals is significantly reduced compared to *GFP(RNAi)* animals (n=10). Each dot represents the average distance migrated by 10 most distal cells from each animal. Lines and error bars indicate mean and SD. Student's t test: \*p<0.05.

(S) Quantification shows that the number of stem cells (green) and early progeny (magenta) with extended processes is unaffected in *Notum(RNAi)* compared to *GFP(RNAi)* animals (n=10). The results are expressed as means  $\pm$ SD. Student's t test used for analysis.

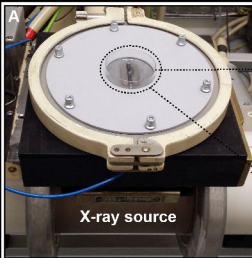

Shielded irradiation apparatus

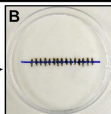

Planarians

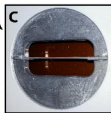

Lead shield

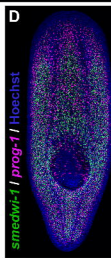

WT

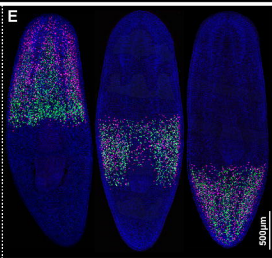

Striped worms, 4dpi

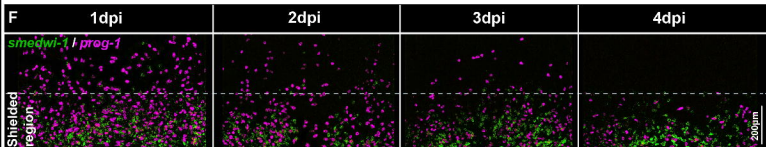

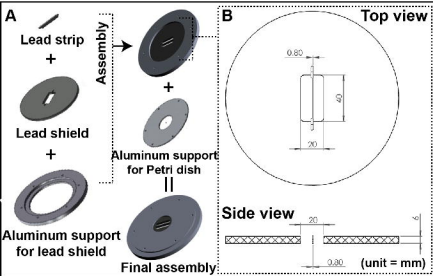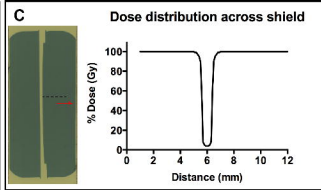

**A***smedwi-1* / Hoechst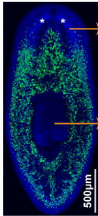

Brain

Pharynx

Intact

**B***smedwi-1* / Hoechst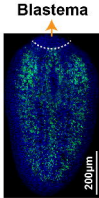

Blastema

Tail, 3dpa

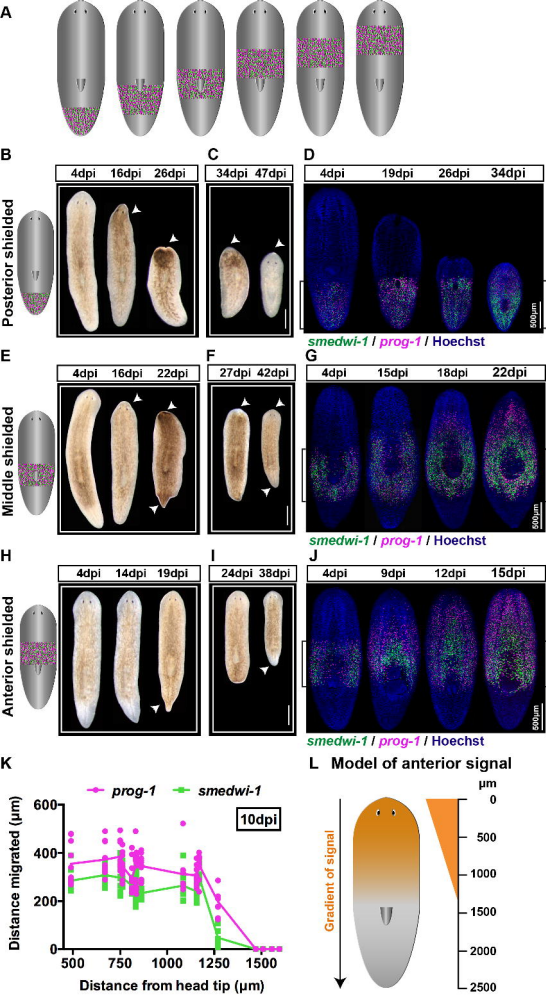

**A**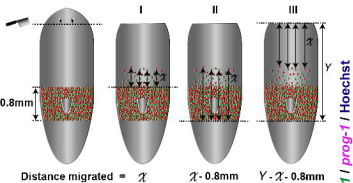**B**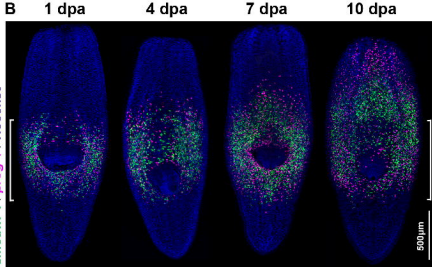**C**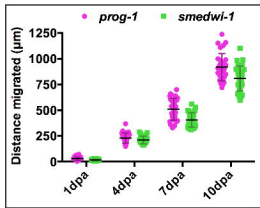**D**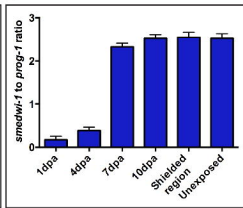**E**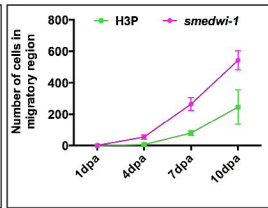

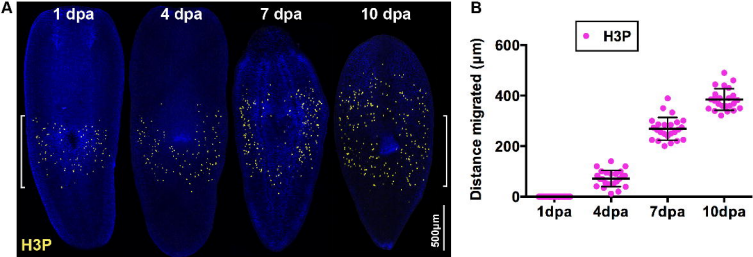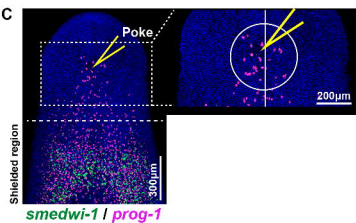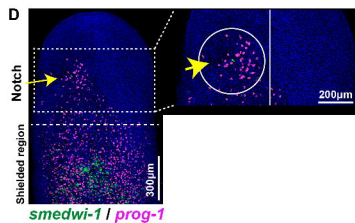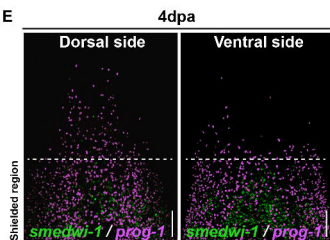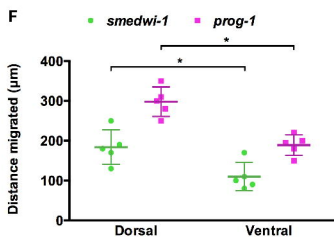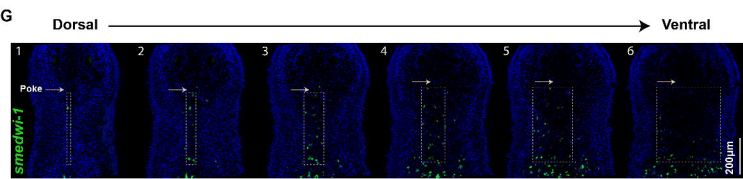



# A Uninjured: Cells in shielded region

6dpi

*smedwi-1* / *prog-1* / Hoechst

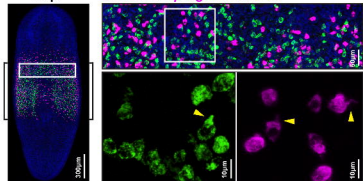

# B Decapitated: Cells in shielded region

2dpa/6dpi

*smedwi-1* / *prog-1* / Hoechst

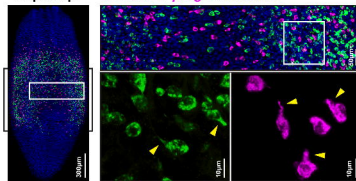

# C Decapitated: Cells in migratory region

2dpa/6dpi

*smedwi-1* / *prog-1* / Hoechst

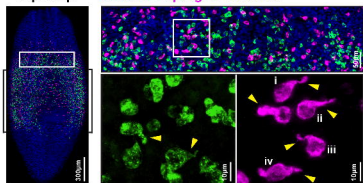

# D

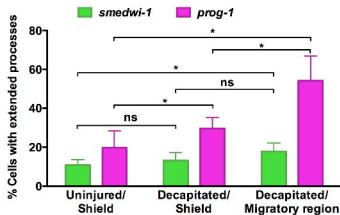

*prog-1* N = Nucleus

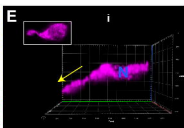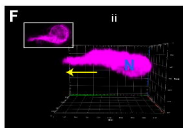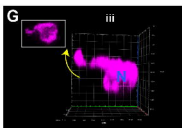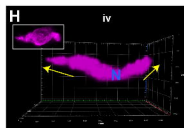

**A**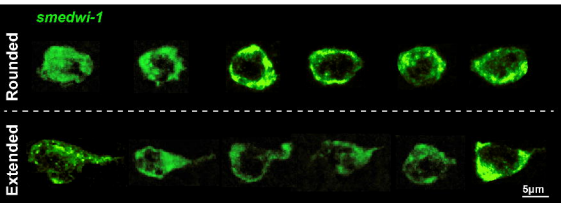**B**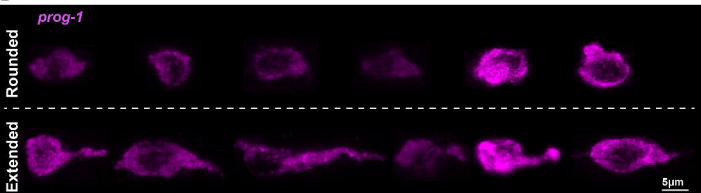

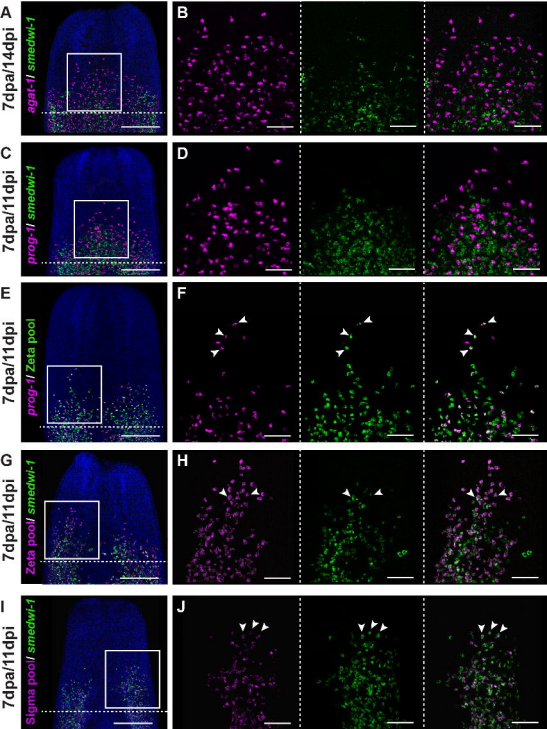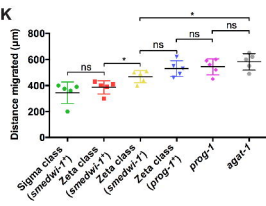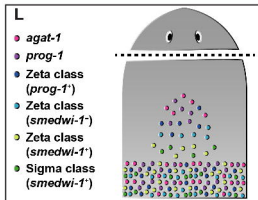

Decapitated, 7dpa

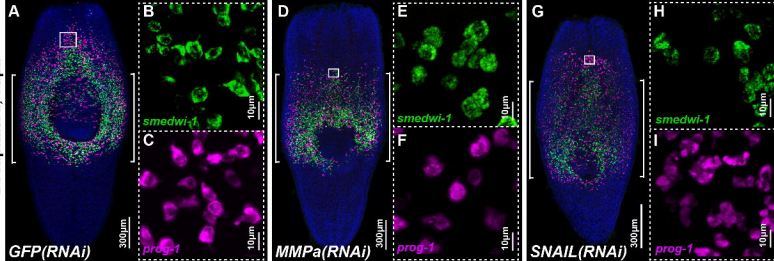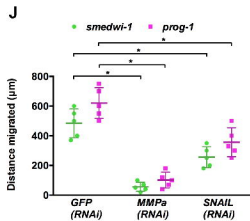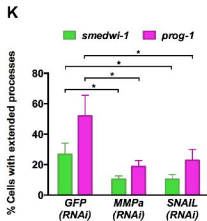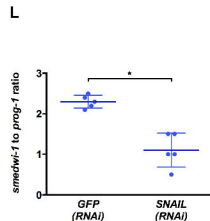

**A Regeneration at 11dpa**

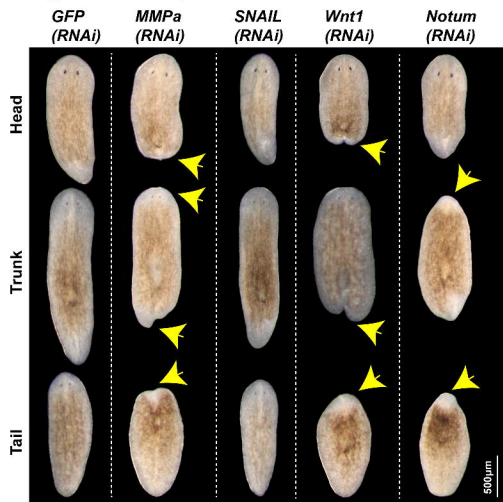

**B Regeneration in shielded irradiation assay**

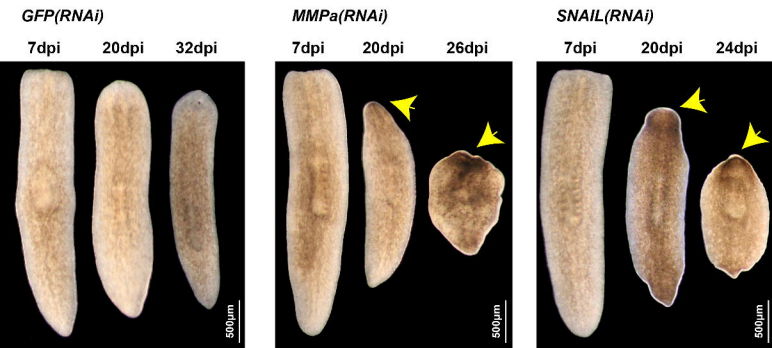

Decapitated, 7dpa

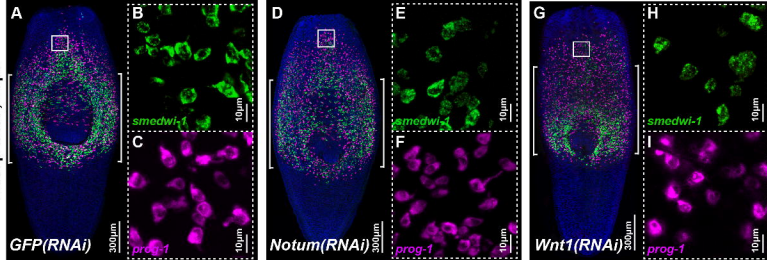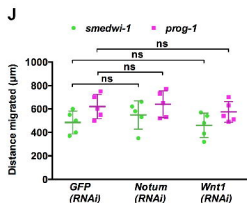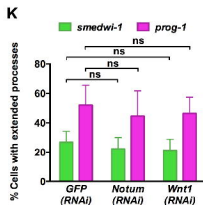

Intact, 10dpi

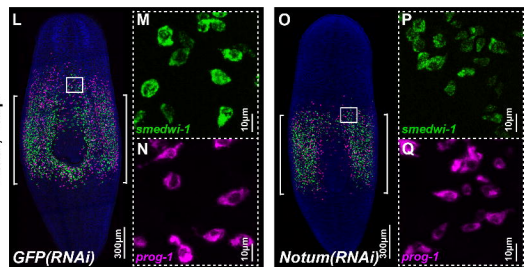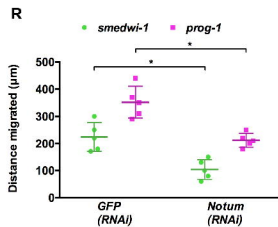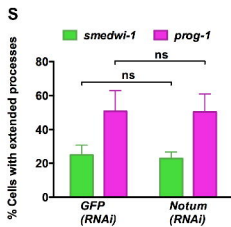

Source: http://biorxiv.org/content/10.1101/080853v1.full.pdf
